1           **An evaluation of the Air Quality Health Index Program on respiratory**  
2           **diseases in Hong Kong: an interrupted time series analysis**

3

4           Tonya G. Mason<sup>1</sup>, C. Mary Schooling<sup>1</sup>, King Pan Chan<sup>1</sup>, Linwei Tian<sup>1</sup>

5

6           <sup>1</sup> School of Public Health, Li Ka Shing Faculty of Medicine, The University of Hong Kong,  
7           SAR, China;

8

9           \*Corresponding author:

10          Dr. Linwei Tian, School of Public Health, Li Ka Shing Faculty of Medicine, The University of  
11          Hong Kong, Patrick Manson Building North Wing, 7 Sassoon Road, Pokfulam, Hong Kong  
12          SAR, China. Phone (+852) 3917 9280; **Email:** [linweit@hku.hk](mailto:linweit@hku.hk)

13

14 **Abstract**

15 **Background:** On December 30<sup>th</sup>, 2013, the Hong Kong government implemented the Air  
16 Quality Health Index (AQHI) to reduce short-term impacts of air pollution on the population.  
17 However, whether air quality alert programs, such as the AQHI, reduce morbidity is still  
18 questionable. Using a quasi-experimental design, we conducted the first evaluation of the AQHI  
19 in Hong Kong focusing on respiratory morbidity.

20 **Method:** Interrupted time series with Poisson segmented regression from 2010 to 2016 were  
21 used to detect any sudden or gradual changes in emergency respiratory hospital admissions,  
22 adjusted for air pollutants (NO<sub>2</sub>, SO<sub>2</sub>, PM<sub>10</sub>, O<sub>3</sub>), temperature and humidity, when the AQHI  
23 policy was implemented. Findings were validated using three false policy periods. We also  
24 assessed changes by specific respiratory diseases (respiratory tract infections (RTI), asthma,  
25 chronic obstructive pulmonary disease and pneumonia) and by age.

26 **Results:** From January 1<sup>st</sup>, 2010- December 31<sup>st</sup>, 2016, 10576.98 deseasonalized, age- and sex-  
27 standardized hospital admissions for respiratory diseases occurred in Hong Kong. On  
28 implementation of the AQHI, RTI admissions immediately dropped by 14% (relative risk (RR)  
29 0.86 95% confidence interval (CI) 0.76-0.98). In age specific analysis, immediate reductions in  
30 hospital admissions, were only apparent in children for RTI (RR 0.84, 95% CI 0.74-0.96) and  
31 pneumonia (RR 0.88, 95% CI 0.60-0.96).

32 **Conclusion:** Hong Kong's AQHI helped reduced hospital admissions in children, particularly  
33 for RTI and pneumonia. To maximize the health benefits of the policy, at risk groups need to be  
34 able to follow the behavioral changes recommended by the AQHI index.

35 **Keywords:** AQHI; Respiratory diseases; Interrupted time series; Segmented regression

36

## 37 1. Introduction

38 Air pollution is a major risk factor for chronic respiratory diseases (World Health Organization  
39 2017a) affecting hundreds of millions of people on a daily basis (World Health Organization  
40 2017b). In 2016 the World Health Organization (WHO) reported air pollution to be responsible  
41 for 4.6 million premature deaths with 18% being from respiratory diseases (World Health  
42 Organization 2016). Numerous observation studies in both developing and developed countries  
43 have shown air pollution associated with hospital admissions for respiratory diseases (Wong et  
44 al. 1999; Medina-Ramón, Zanobetti, and Schwartz 2006; Wang et al. 2012; Tao et al. 2014a).  
45 Air pollution exacerbates respiratory conditions in “at risk” populations, such as seniors  $\geq 65$ ,  
46 young children and persons with preexisting respiratory conditions. For example, based on a  
47 study conducted in eight European cities, hospital admissions for chronic obstructive pulmonary  
48 disease (COPD) plus asthma and total respiratory disease for the elderly (65+), increased by  
49 1.0% and 0.9% for every  $10\mu\text{g}/\text{m}^3$  increase in particulate matter with aerodynamic diameter  $\geq 10$   
50 ( $\text{PM}_{10}$ ) (ATKINSON et al. 2001). In addition, hospital admissions for asthma were slightly  
51 higher in younger children (0-14) (1.2% change in hospital admission per  $10\mu\text{g}/\text{m}^3$  increase in  
52  $\text{PM}_{10}$ ) (ATKINSON et al. 2001).

53  
54 Due to rapid industrialization and economic growth, air pollution has become a major public  
55 health issue in China (Xu et al. 2016), with levels of some pollutants well above those generally  
56 seen in Western settings (Wong, Tam, and Yu 2002). With an increasing number of vehicles on  
57 the road and emissions from industrial activities, Chinese cities are now experiencing very poor  
58 air quality, to the point where it reduces visibility (Zhang and Samet 2015). Numerous studies  
59 have shown air pollution in major cities, such as Beijing and Hong Kong, is so severe— it has  
60 now become a major threat to the human health and well-being. (Wong et al. 1999; Xiong et al.  
61 2015) (Wong et al. 2002; Tao et al. 2014b).

62 Clearly the long-term solution is inter-governmental action to improve air quality, meanwhile in  
63 the short-term, to mitigate public health issues arising from poor air quality, globally,  
64 governments have implemented air quality alert programs. These programs advise the public to  
65 take precautions when air quality is poor. Despite their popularity, how successful air quality  
66 alert programs are at reducing morbidity and mortality is still questionable. Previous evaluations  
67 of air quality alert systems have been conducted with some studies finding them to be effective  
68 (Neidell 2010; Mullins and Bharadwaj 2014) while others found they have a limited effect on  
69 public health (Chen et al. 2018). Moreover, public response to these programs may be culturally  
70 or setting specific. Here, we took advantage of the introduction of Hong Kong’s air quality health  
71 index (AQHI) alerts ( December 30<sup>th</sup>, 2013), aimed at the “at risk” population (seniors  $\geq 65$  years,  
72 young children, persons with preexisting respiratory and cardiovascular diseases) (EPD 2013a),  
73 to assess the effect of such a policy on respiratory diseases. The AQHI advises the public,  
74 including “at risk” populations, of the protective measures to take to reduce exposure to poor air  
75 quality (CHP 2014)(Table1.). The advice is regularly communicated via local newspapers, radio  
76 and television channels on an hourly basis (Environmental Protection Department. The  
77 Government of the Hong Kong Special Administrative Region. 2013). AQHI forecasts can also  
78 be sent to smartphones and desktop computers by through use of the AQHI “app”  
79 (Environmental Protection Department. The Government of the Hong Kong Special

80 Administrative Region. 2013). The majority of the Hong Kong population have access to these  
81 services. The AQHI has a 5-point scale low risk, moderate risk, high risk, very high risk and  
82 serious (CHP 2014; EPD 2013b) based on a 3 hour-moving average of a combination of air  
83 pollutants (nitrogen dioxide (NO<sub>2</sub>), sulfur dioxide (SO<sub>2</sub>), ozone (O<sub>3</sub>) and particulate matter (PM<sub>10</sub>  
84 or PM<sub>2.5</sub>))(EPD 2013b). Here, using a quasi-experimental design, we conducted the first  
85 evaluation of the AQHI to assess the effect on respiratory diseases, overall, by subtype and by  
86 age in the highly polluted mega-city of Hong Kong.

87

## 88 **2. Materials and Methods**

### 89 *2.1 Study population*

90 The study population was the whole population of Hong Kong. Hospital admissions from 2010-  
91 16 for all publicly funded hospitals in Hong Kong, accounting for 90% of hospital beds in Hong  
92 Kong (Tian et al. 2015; Wong et al. 1999), were obtained from the Hospital Authority for all  
93 respiratory diseases. Discharges are routinely coded based on International Classification of  
94 Diseases Ninth Revision (ICD9). The population was considered overall, and by age, as children  
95 (<20 years), adult (20-<65 years) and elderly (65+years) because of the different vulnerabilities  
96 of these age-groups.

### 97 *2.2 Outcomes*

98 Outcomes considered were hospital admissions for respiratory diseases (RDs), including all  
99 respiratory diseases (ICD9 460–519), respiratory tract infections (RTIs) (ICD9 460–478), asthma  
100 (ICD9 493), chronic obstructive pulmonary disease (COPD) (ICD9 491, 492, 496) and  
101 pneumonia (ICD9 480:486). Admissions were classified only on the principal discharge code. As  
102 a control outcome, we also considered mortality rates for injuries, poisonings and other external  
103 causes (S00-T98), because these would not be expected to respond to the AQHI. These mortality  
104 rates were obtained from the Hong Kong Census and Statistics Department from 2010-2015.

105

### 106 *2.2 Air pollutants and meteorological data*

107 Levels of air pollution (NO<sub>2</sub>, SO<sub>2</sub>, O<sub>3</sub>, PM<sub>10</sub>) were obtained from Hong Kong Environmental  
108 Protection Department (HKEPD) from January 2010-December 2016. Hong Kong has 16 fixed  
109 air pollution monitoring stations: 3 are roadside stations and the other 13 are general stations.  
110 Three of the general stations were excluded due to extensive missing data. The 10 monitoring  
111 stations are representative of Hong Kong's population exposure because the majority of Hong  
112 Kong's population lives within 5 kilometers of these stations (Huang, Leung, and Schooling  
113 2017). We obtained monthly mean pollution concentrations by averaging each pollution  
114 concentration across the 10-monitoring station. Monthly mean temperature and relative humidity  
115 were obtained from the Hong Kong Observatory from 2010-2016.

116

## 117 2.4 Study Design and Statistical Analyses

118 To evaluate the effectiveness of the introduction of the AQHI in December 2015, we used an  
119 interrupted time series study with a Poisson segmented regression analysis from January 2010-  
120 December 2016 to identify sudden and gradual changes in age-standardized hospital admissions  
121 for respiratory diseases (Nistal-Nuño 2017). Hospital admissions were age- and sex-standardized  
122 based on the WHO standard population. The seasonal trend was adjusted for by using the  
123 seasonal trend decomposition loess (STL) procedure, to retrieve the deseasonalized data prior to  
124 carrying out the segmented regression models (Cleveland et al. 1990; Jassim, Coskuner, and  
125 Munir 2018).

126 Deseasonalized, age- and sex-standardized respiratory hospitalizations ( $Y_t$ ) were regressed on  
127 time (see equation below). The mean number of hospitalizations at the beginning of the study  
128 period, baseline period, are represented as ( $\beta_0$ ). Trends over time are captured by ( $\beta_1$ ). The AQHI  
129 intervention is represented as ( $\beta_2$ ), it takes the value of 0 for the pre-intervention period, and 1  
130 for post intervention. Gradual changes were detected by including an interaction term between  
131 the policy and time ( $\beta_3$ ). All other covariates adjusted for, i.e., air pollutants, temperature and  
132 humidity, are captured by  $\beta_4$ .

$$133 Y_t = \beta_0 + \beta_1 \times \text{time}_t + \beta_2 \times \text{intervention}_t + \beta_3 \times \text{time after intervention}_t + \beta_4 + \varepsilon_t (1)$$

134 Residuals were plotted to check for over dispersion.

135 Model validity was tested by implemented three false policy periods 6 months, 12 months and 24  
136 months before the intervention (Stallings-Smith et al. 2013).

137 All statistical analysis were conducted using the software package R 3.4.2.

## 138 **Ethics**

139 For this entire study aggregated data were used, thus ethical approval is not required.

## 140 **3. Results**

141 The monthly mean respiratory hospital admissions overall and by disease are displayed in Table  
142 2. Monthly mean hospital admissions for all respiratory diseases were 125.9 with a standard  
143 deviation (SD) of 23.83. For individual respiratory diseases, pneumonia had the highest hospital  
144 admission (mean: 48.12; SD: 8.28) followed by RTIs (mean: 26.18; SD: 5.42). On average,  
145 there were 23.70 (SD: 4.83) and 7.85 (SD: 1.37) hospital admissions per month, for COPD and  
146 asthma. Influenza had mean monthly hospital admissions of 23.45 (SD: 4.95). NO<sub>2</sub>, SO<sub>2</sub>, PM<sub>10</sub>  
147 and O<sub>3</sub> had monthly mean concentrations of 49.12 (SD: 10.15), 11.27 (SD: 2.64), 41.88 (SD:  
148 16.84), 42.04 (SD: 12.73), respectively. Overall from January 2010 to December 2016 10576.98  
149 hospital admission for respiratory diseases occurred.

150 Table 3 summarizes the immediate and gradual effects of the AQHI policy on respiratory  
151 diseases, illustrated in figure 1. Following the policy an immediate decrease was observed for  
152 RTIs, which fell 14% (relative risk (RR) 0.86 95% confidence interval (CI) 0.76-0.98), followed  
153 by a static trend (RR 1.00 95% CI 0.99-1.00). In contrast, no immediate or gradual decreases

154 were observed in hospital admissions for all respiratory diseases, COPD, asthma or pneumonia  
155 after implementation of the policy, although the estimate for overall respiratory admissions was  
156 RR 0.92, 95% CI 0.81-1.04, and for and pneumonia was RR 0.88, 95% CI 0.88-1.20. No gradual  
157 post policy change was evident for any disease considered.

158 Age stratified estimates are displayed in table 4. Post policy the only significant immediate  
159 decrease was detected in children (<20 years) for RTI and pneumonia hospital admissions. In  
160 children RTI dropped by 16% (RR 0.84, 95% CI 0.74-0.96) and pneumonia by 24% (RR 0.88,  
161 95% CI 0.60-0.96) respectively (see supplementary Figures 3 & 4). An increasing annual trend  
162 was observed after the policy for both diseases. In contrast, for all other diseases and age-groups  
163 considered no immediate decrease or changes in annual trend were observed after the AQHI  
164 policy was implemented. A non-significant reduction in respiratory diseases was only observed  
165 in children (<20 years) immediately after the policy implementation (RR 0.86, 95% CI 0.74-  
166 1.00) (Figure 2).

167 Using the false policy implementation dates of 6, 12 and 24 months before the policy, revealed  
168 no significant immediate or gradual decreases in hospital admissions for most diseases  
169 considered, except for COPD at a false period of 12 months (see supplementary Table 3) .  
170 Repeating the analysis for the control outcome of deaths from injuries and external causes gave  
171 no immediate changes when the AQHI policy was implemented (see supplementary Figure 5).

172

#### 173 **4. Discussion**

174 Hong Kong's AQHI policy implementation was associated with an immediate reduction in RTI  
175 hospitalizations, in particular for children but did not clearly affect respiratory disease  
176 hospitalizations overall, or hospitalizations for COPD, asthma and pneumonia. Our findings are  
177 somewhat consistent with other intervention studies evaluating air quality alert impacts in  
178 Canada (Chen et al. 2018) and the United States (US) (Neidell 2010). Like our study, the study  
179 conducted in Canada did not observe any significant immediate or gradual declining changes for  
180 asthma or COPD hospital admissions after the implementation of the AQHI. The US study  
181 (Neidell 2010) focused on the effect air quality alerts pertaining to ozone on outdoor activities  
182 but not health effects. They found children more responsive to air quality warnings (25%  
183 decrease in zoo attendance).

184 Our findings add to the literature concerning the impact air quality alerts on respiratory diseases,  
185 particularly for RTI where published evidence is limited. Air pollution is strongly associated  
186 with RTIs, particularly in children (Li et al. 2018; Darrow et al. 2014; Bono et al. 2016; Ghosh et  
187 al. 2012). Prior work done by researchers in Rome has demonstrated an association between NO<sub>2</sub>  
188 and O<sub>3</sub> and hospital admissions for respiratory tract infections in children (Fusco et al. 2001). Out  
189 of all respiratory diseases, NO<sub>2</sub> had a stronger effect on respiratory tract infections on same day  
190 lag period (lag0,4.0%increase) (Fusco et al. 2001). As such, any decline in RTI with the  
191 implementation of AQHI warnings is likely to be the result of caretakers —likely women,  
192 keeping children indoors in response to the AQHI warnings. Women have a greater concern for  
193 the effects of air pollution on health, than men (Flynn, Slovic, and Mertz 1994; Lu 2015). The

194 sudden drop in pneumonia hospital admissions for children is consistent with the fall in RTI  
195 admissions. Air pollution is known to be associated with pneumonia hospital admissions in  
196 children (Negrisoni and Nascimento 2013; Souza and Nascimento 2016; Lv et al. 2017)

197 Similar to other cities in the world (UK, Canada, U.S.A); Hong Kong's AQHI policy alerts the  
198 public to risk and thereby promotes behavioral changes for "at risk populations" (Radisic and  
199 Newbold 2016). As such, health effects of the policy only occur if the population at risk changes  
200 its behavior in response to the information as well as the associated lower exposure reducing  
201 disease. A qualitative study done by Radisic and Newbold in 2016 concluded that proper  
202 adaption to the AQHI depended on knowledge about the AQHI and characteristics of the policy;  
203 and perception about air quality and health. People less educated about the AQHI were less  
204 likely to adopt the behavioral changes suggested by the policy, which may include the elderly  
205 (Radisic and Newbold 2016). Older people are most vulnerable to COPD and pneumonia but  
206 they may not respond immediately to new information (Radisic and Newbold 2016). This  
207 consideration may be particularly relevant in Hong Kong where a substantial proportion of older  
208 people are illiterate, and so may find it harder to access the AQHI. As for hospital admissions for  
209 asthma, these are less clearly linked to air pollution, given the mixed findings from previous  
210 studies (Schwartz 1996; Dab et al. 1996; Katsouyanni et al. 1997). Past studies have shown a  
211 stronger association of grass pollen (released before and during thunderstorms) with asthma  
212 hospital admissions than air pollution (Celenza et al. 1996; Davidson et al. 1996) (Gouveia and  
213 Fletcher 2000). Furthermore, emergency hospital admission in Hong Kong consists of severe  
214 cases of asthma attacks. The less severe cases are usually advised to be treated at private or  
215 public clinics and never recorded under hospital admissions dataset because more likely the  
216 patient leaves immediately after medical care (Hospital Authority 2018). Asthma results for our  
217 study aligns with a recent air quality intervention study done in Canada that reported a  
218 significant drop in emergency admissions for asthma but none for hospital admissions (Chen et  
219 al. 2018). Recently, in Hong Kong air pollution is not clearly linked to hospital admissions for  
220 asthma.

221 To the best of our knowledge, this study is the first study to document the AQHI effect on  
222 respiratory diseases in Hong Kong. Another major key strength of our study, is the study design.  
223 The use of the interrupted time series analysis is known to be a very powerful evaluative design  
224 when randomized control studies are not feasible (Lopez Bernal, Cummins, and Gasparrini  
225 2016). The design allowed us to account for secular trends (Penfold and Zhang 2013). The use of  
226 a negative control outcome is also a strength of the study because it can be used to detect  
227 unknown time varying confounders, and thereby strengthens the validity of our findings. Our  
228 study also sheds some light on the potential effects AQHI may have on other respiratory diseases  
229 such as RTIs for which there is limited published evidence. Like all studies, we also have some  
230 weaknesses. Firstly, ITS cannot be used to make causal inferences on an individual level due to  
231 the fact that we used aggregated data (hospital admissions) instead of individual data. However,  
232 the target of policy is population health, is assessed here. Secondly, our study included only  
233 hospital admissions and lacked numbers from other outpatient settings such as physician visits.  
234 However, in these circumstances it is particularly notable that we found an effect on RTIs.  
235 Thirdly, our study did not include a sex specific analysis, which may clarify whether there are  
236 sex-specific responses to health information. Future studies should assess sex-specific effects of

237 the policy. Lastly, response to an AQHI depends on the public both accessing the relevant  
238 information and being able to act on it. We do not have information about the level of awareness  
239 of the AQHI in the general population, nor do we know whether everybody was able to respond  
240 to the AQHI warnings. For example, people working in outdoor jobs might not be able to take  
241 the recommended action. Given, the effectiveness of the AQHI in our setting further research on  
242 awareness might inform the implementation of similar policies. Consideration should also be  
243 given to the feasibility of the population responding to AQHI warnings  
244  
245

## 246 **5. Conclusion**

247 The implementation of Hong Kong's AQHI policy resulted in health benefits specifically a  
248 reduction in RTI and pneumonia hospital admissions amongst children. To maximize the health  
249 benefits of the policy, at risk populations need to be aware on the information, free to take the  
250 suggested actions and willing to do so. This study provides valuable information about the  
251 effectiveness of the AQHI to policy makers and may inform the decision to take further action if  
252 needed.

253

## 254 **6. Acknowledgements**

255 We thank the Center for Health Protection (CHP) report for supplying the health data and the  
256 Environmental Protection Department of the Hong Kong Special Administrative Region for  
257 providing the air monitoring data for this study.

258

259

260

## **References**

261 ATKINSON, RICHARD W., H. ROSS ANDERSON, JORDI SUNYER, JON AYRES,  
262 MICHELA BACCINI, JUDITH M. VONK, AZZEDINE BOUMGHAR, et al. 2001.  
263 "Acute Effects of Particulate Air Pollution on Respiratory Admissions." *American Journal*  
264 *of Respiratory and Critical Care Medicine* 164 (10). American Thoracic Society New York,  
265 NY: 1860–66. doi:10.1164/ajrccm.164.10.2010138.

266 Celenza, A, J Fothergill, E Kupek, and R J Shaw. 1996. "Thunderstorm Associated Asthma: A  
267 Detailed Analysis of Environmental Factors." *BMJ (Clinical Research Ed.)* 312 (7031).  
268 British Medical Journal Publishing Group: 604–7. doi:10.1136/BMJ.312.7031.604.

269 Chen, Hong, Qiongsi Li, Jay S Kaufman, Jun Wang, Ray Copes, Yushan Su, and Tarik  
270 Benmarhnia. 2018. "Effect of Air Quality Alerts on Human Health: A Regression  
271 Discontinuity Analysis in Toronto, Canada." *The Lancet Planetary Health* 2 (1). Elsevier:  
272 e19–26. doi:10.1016/S2542-5196(17)30185-7.

273 CHP. 2014. "Air Quality Health Index Has Come into Effect."  
274 [https://www.chp.gov.hk/files/pdf/aqhi\\_eng\\_final\\_20140103.pdf](https://www.chp.gov.hk/files/pdf/aqhi_eng_final_20140103.pdf).

275 Cleveland, Robert B, William S Cleveland, Jean E McRae, and Irma Terpenning. 1990. "STL: A



- 276 Seasonal-Trend Decomposition Procedure Based on Loess.” *Journal of Official Statistics* 6  
277 (1): 3–73. <http://www.nniiem.ru/file/news/2016/stl-statistical-model.pdf>.
- 278 Dab, W, S Medina, P Quénel, Y Le Moullec, A Le Tertre, B Thelot, C Monteil, et al. 1996.  
279 “Short Term Respiratory Health Effects of Ambient Air Pollution: Results of the APHEA  
280 Project in Paris.” *Journal of Epidemiology and Community Health* 50 Suppl 1 (Suppl 1).  
281 BMJ Publishing Group Ltd: s42-6. doi:10.1136/JECH.50.SUPPL\_1.S42.
- 282 Davidson, A C, J Emberlin, A D Cook, K M Venables, Ruth Brown, Alice Findlay, Miriam  
283 Harris, et al. 1996. “A Major Outbreak of Asthma Associated with a Thunderstorm:  
284 Experience of Accident and Emergency Departments and Patients’ Characteristics. Thames  
285 Regions Accident and Emergency Trainees Association.” *BMJ (Clinical Research Ed.)* 312  
286 (7031). British Medical Journal Publishing Group: 601–4. doi:10.1136/BMJ.312.7031.601.
- 287 Environmental Protection Department. The Government of the Hong Kong Special  
288 Administrative Region. 2013. “How Can I Get the AQHI Information? - Page 6.”  
289 <http://www.aqhi.gov.hk/en/what-is-aqhi/about-aqhia37a.html?showall=&start=5>.
- 290 EPD. 2013a. “EPD - About AQHI.” <http://www.aqhi.gov.hk/en/what-is-aqhi/about-aqhi.html>.  
291 ———. 2013b. “EPD - About AQHI.”
- 292 Flynn, James, Paul Slovic, and C. K. Mertz. 1994. “Gender, Race, and Perception of  
293 Environmental Health Risks.” *Risk Analysis* 14 (6). Blackwell Publishing Ltd: 1101–8.  
294 doi:10.1111/j.1539-6924.1994.tb00082.x.
- 295 Fusco, D, F Forastiere, P Michelozzi, T Spadea, B Ostro, M Arcà, and C A Perucci. 2001. “Air  
296 Pollution and Hospital Admissions for Respiratory Conditions in Rome, Italy.” *The  
297 European Respiratory Journal* 17 (6). European Respiratory Society: 1143–50.  
298 <http://www.ncbi.nlm.nih.gov/pubmed/11491157>.
- 299 Gouveia, Nelson, and Tony Fletcher. 2000. “Respiratory Diseases in Children and Outdoor Air  
300 Pollution in São Paulo, Brazil: A Time Series Analysis.” *Occup Environ Med* 57: 477–83.  
301 doi:10.1136/oem.57.7.477.
- 302 Hospital Authority. 2018. “Accident and Emergency (A&E).”  
303 [http://www.ha.org.hk/visitor/ha\\_visitor\\_index.asp?Content\\_ID=10051&Lang=ENG&Dimension=100&Ver=HTML](http://www.ha.org.hk/visitor/ha_visitor_index.asp?Content_ID=10051&Lang=ENG&Dimension=100&Ver=HTML).  
304
- 305 Huang, Jian V, Gabriel M Leung, and C Mary Schooling. 2017. “The Association of Air  
306 Pollution With Pubertal Development: Evidence From Hong Kong’s “Children of  
307 1997 “Birth Cohort.” *American Journal of Epidemiology* 185 (10).  
308 doi:10.1093/aje/kww200.
- 309 Jassim, Majeed S., Gulnur Coskuner, and Said Munir. 2018. “Temporal Analysis of Air  
310 Pollution and Its Relationship with Meteorological Parameters in Bahrain, 2006–2012.”  
311 *Arabian Journal of Geosciences* 11 (3). Springer Berlin Heidelberg: 62.  
312 doi:10.1007/s12517-018-3403-z.
- 313 Katsouyanni, K, G Touloumi, C Spix, J Schwartz, F Balducci, S Medina, G Rossi, et al. 1997.  
314 “Short-Term Effects of Ambient Sulphur Dioxide and Particulate Matter on Mortality in 12  
315 European Cities: Results from Time Series Data from the APHEA Project. Air Pollution

- 316 and Health: A European Approach.” *Bmj* 314 (7095): 1658–63.
- 317 Lopez Bernal, James, Steven Cummins, and Antonio Gasparrini. 2016. “Interrupted Time Series  
318 Regression for the Evaluation of Public Health Interventions: A Tutorial.” *International*  
319 *Journal of Epidemiology* 46 (1). Oxford University Press: 348. doi:10.1093/ije/dyw098.
- 320 Lu, Yuanan. 2015. “Research Residents’ Perception of Air Quality, Pollution Sources, and Air  
321 Pollution Control in Nanchang, China ArticleHistory.” *Atmospheric Pollution Research* 6:  
322 835–41. doi:10.5094/APR.2015.092.
- 323 Lv, Chenguang, Xianfeng Wang, Na Pang, Lanzhong Wang, Yuping Wang, Tengfei Xu, Yu  
324 Zhang, Tianran Zhou, and Wei Li. 2017. “The Impact of Airborne Particulate Matter on  
325 Pediatric Hospital Admissions for Pneumonia among Children in Jinan, China: A Case-  
326 Crossover Study The Impact of Airborne Particulate Matter on Pediatric Ho.” *Journal of the*  
327 *Air & Waste Management Association* 67 (6): 669–76.  
328 doi:10.1080/10962247.2016.1265026.
- 329 Medina-Ramón, Mercedes, Antonella Zanobetti, and Joel Schwartz. 2006. “The Effect of Ozone  
330 and PM10 on Hospital Admissions for Pneumonia and Chronic Obstructive Pulmonary  
331 Disease: A National Multicity Study.” *American Journal of Epidemiology* 163 (6). Oxford  
332 University Press: 579–88. doi:10.1093/aje/kwj078.
- 333 Mullins, Jamie, and Prashant Bharadwaj. 2014. “EFFECTS OF SHORT-TERM MEASURES  
334 TO CURB AIR POLLUTION: EVIDENCE FROM SANTIAGO, CHILE.”  
335 doi:10.1093/ajae/aau081.
- 336 Negrisoli, Juliana, and Luiz Fernando C Nascimento. 2013. “Atmospheric Pollutants and  
337 Hospital Admissions Due to Pneumonia in Children.” *Revista Paulista de Pediatria* □:  
338 *Orgao Oficial Da Sociedade de Pediatria de Sao Paulo* 31 (4). Sociedade De Pediatria De  
339 Sao Paulo: 501–6. doi:10.1590/S0103-05822013000400013.
- 340 Neidell, Matthew. 2010. “Air Quality Warnings and Outdoor Activities: Evidence from Southern  
341 California Using a Regression Discontinuity Design.” *Journal of Epidemiology and*  
342 *Community Health* 64 (10). BMJ Publishing Group Ltd: 921–26.  
343 doi:10.1136/jech.2008.081489.
- 344 Nistal-Nuño, Beatriz. 2017. “Segmented Regression Analysis of Interrupted Time Series Data to  
345 Assess Outcomes of a South American Road Traffic Alcohol Policy Change.” *Public*  
346 *Health* 150 (September). W.B. Saunders: 51–59. doi:10.1016/J.PUHE.2017.04.025.
- 347 Penfold, Robert B, and Fang Zhang. 2013. “Use of Interrupted Time Series Analysis in  
348 Evaluating Health Care Quality Improvements.” *ACAP* 13: S38–44.  
349 doi:10.1016/j.acap.2013.08.002.
- 350 Radisic, Sally, and K Bruce Newbold. 2016. “Factors Influencing Health Care and Service  
351 Providers’ and Their Respective ‘at Risk’ Populations’ Adoption of the Air  
352 Quality Health Index (AQHI): A Qualitative Study.” *BMC Health Services Research* 16  
353 (March). BioMed Central: 107. doi:10.1186/s12913-016-1355-0.
- 354 Schwartz, Joel. 1996. “Air Pollution and Hospital Admissions for Respiratory Disease.” *Source:*  
355 *Epidemiology* 7 (1): 20–28. <http://www.jstor.org/stable/3702752>.

- 356 Souza, Laís Salgado Vieira de, and Luiz Fernando Costa Nascimento. 2016. “Air Pollutants and  
357 Hospital Admission Due to Pneumonia in Children: A Time Series Analysis.” *Revista Da*  
358 *Associação Médica Brasileira* 62 (2): 151–56. doi:10.1590/1806-9282.62.02.151.
- 359 Stallings-Smith, Sericea, Ariana Zeka, Pat Goodman, Zubair Kabir, and Luke Clancy. 2013.  
360 “Reductions in Cardiovascular, Cerebrovascular, and Respiratory Mortality Following the  
361 National Irish Smoking Ban: Interrupted Time-Series Analysis.” Edited by Lamberto  
362 Manzoli. *PLoS ONE* 8 (4). Public Library of Science: e62063.  
363 doi:10.1371/journal.pone.0062063.
- 364 Tao, Yan, Shengquan Mi, Shuhong Zhou, Shigong Wang, and Xiaoyun Xie. 2014a. “Air  
365 Pollution and Hospital Admissions for Respiratory Diseases in Lanzhou, China.”  
366 *Environmental Pollution* 185: 196–201. doi:10.1016/j.envpol.2013.10.035.
- 367 ———. 2014b. “Air Pollution and Hospital Admissions for Respiratory Diseases in Lanzhou,  
368 China.” *Environmental Pollution* 185: 196–201. doi:10.1016/j.envpol.2013.10.035.
- 369 Tian, Linwei, Hong Qiu, Vivian C Pun, Kin-Fai Ho, Chi Sing Chan, and Ignatius T S Yu. 2015.  
370 “Carbon Monoxide and Stroke: A Time Series Study of Ambient Air Pollution and  
371 Emergency Hospitalizations ☆,☆☆,★,★★.” *International Journal of Cardiology* 201: 4–  
372 9. doi:10.1016/j.ijcard.2015.07.099.
- 373 Wang, Minzhen, Shan Zheng, Shigong Wang, Yan Tao, and Kezheng Shang. 2012. “[A Time-  
374 Series Study on the Relationship between Gaseous Air Pollutants and Daily Hospitalization  
375 of Respiratory Disease in Lanzhou City].” *Wei Sheng Yan Jiu = Journal of Hygiene*  
376 *Research* 41 (5): 771–75. <http://www.ncbi.nlm.nih.gov/pubmed/23213692>.
- 377 Wong, T W, T S Lau, T S Yu, A Neller, S L Wong, W Tam, and S W Pang. 1999. “Air Pollution  
378 and Hospital Admissions for Respiratory and Cardiovascular Diseases in Hong Kong.”  
379 *Occup Environ Med* 56 (10): 679–83.
- 380 Wong, T W, W S Tam, and T S Yu. 2002. “Associations between Daily Mortalities from  
381 Respiratory and Cardiovascular Diseases and Air Pollution in Hong Kong, China.”  
382 *Occupational and Environmental Medicine* 59 (1): 30–35. doi:10.1136/oem.59.1.30.
- 383 Wong, T W, W S Tam, T S Yu, and A H S Wong. 2002. “Associations between Daily  
384 Mortalities from Respiratory and Cardiovascular Diseases and Air Pollution in Hong Kong,  
385 China.” *Occup Environ Med* 59: 30–35.  
386 <http://oem.bmj.com/content/oemed/59/1/30.full.pdf>.
- 387 World Health Organization. 2016. “WHO | Ambient (Outdoor) Air Quality and Health.” *Who*.  
388 [http://www.who.int/news-room/fact-sheets/detail/ambient-\(outdoor\)-air-quality-and-health](http://www.who.int/news-room/fact-sheets/detail/ambient-(outdoor)-air-quality-and-health).
- 389 ———. 2017a. “WHO | Air Pollution.” *WHO*. World Health Organization.  
390 <http://www.who.int/ceh/risks/cehair/en/>.
- 391 ———. 2017b. “WHO | Ambient Air Quality.” *Who*. World Health Organization.  
392 [http://www.who.int/phe/health\\_topics/outdoorair/en/](http://www.who.int/phe/health_topics/outdoorair/en/).
- 393 Xiong, Qiulin, Wenji Zhao, Zhaoning Gong, Wenhui Zhao, and Tao Tang. 2015. “Fine  
394 Particulate Matter Pollution and Hospital Admissions for Respiratory Diseases in Beijing,

- 395 China.” *International Journal of Environmental Research and Public Health* 12 (9).  
396 Multidisciplinary Digital Publishing Institute: 11880–92. doi:10.3390/ijerph120911880.
- 397 Xu, Qin, Xia Li, Shuo Wang, Chao Wang, Fangfang Huang, Qi Gao, Lijuan Wu, et al. 2016.  
398 “Fine Particulate Air Pollution and Hospital Emergency Room Visits for Respiratory  
399 Disease in Urban Areas in Beijing, China, in 2013.” *PloS One* 11 (4). Public Library of  
400 Science: e0153099. doi:10.1371/journal.pone.0153099.
- 401 Zhang, Junfeng Jim, and Jonathan M Samet. 2015. “Chinese Haze versus Western Smog:  
402 Lessons Learned.” *Journal of Thoracic Disease* 7 (1). AME Publications: 3–13.  
403 doi:10.3978/j.issn.2072-1439.2014.12.06.
- 404

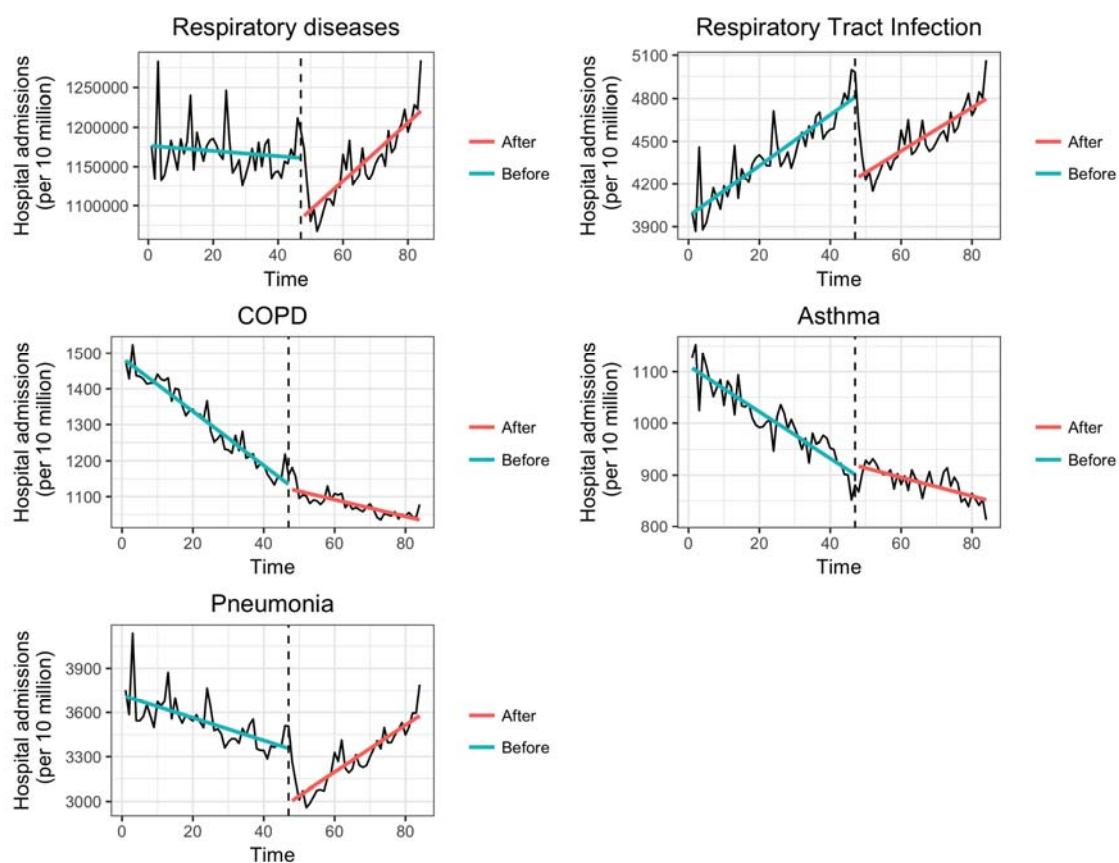

**Fig. 1.** Time series plot of monthly mean, age- and sex-standardised emergency hospital admissions: adjusted for; seasonality, air pollutants and time trend, for all and specific respiratory diseases in Hong Kong, 2010-2016.

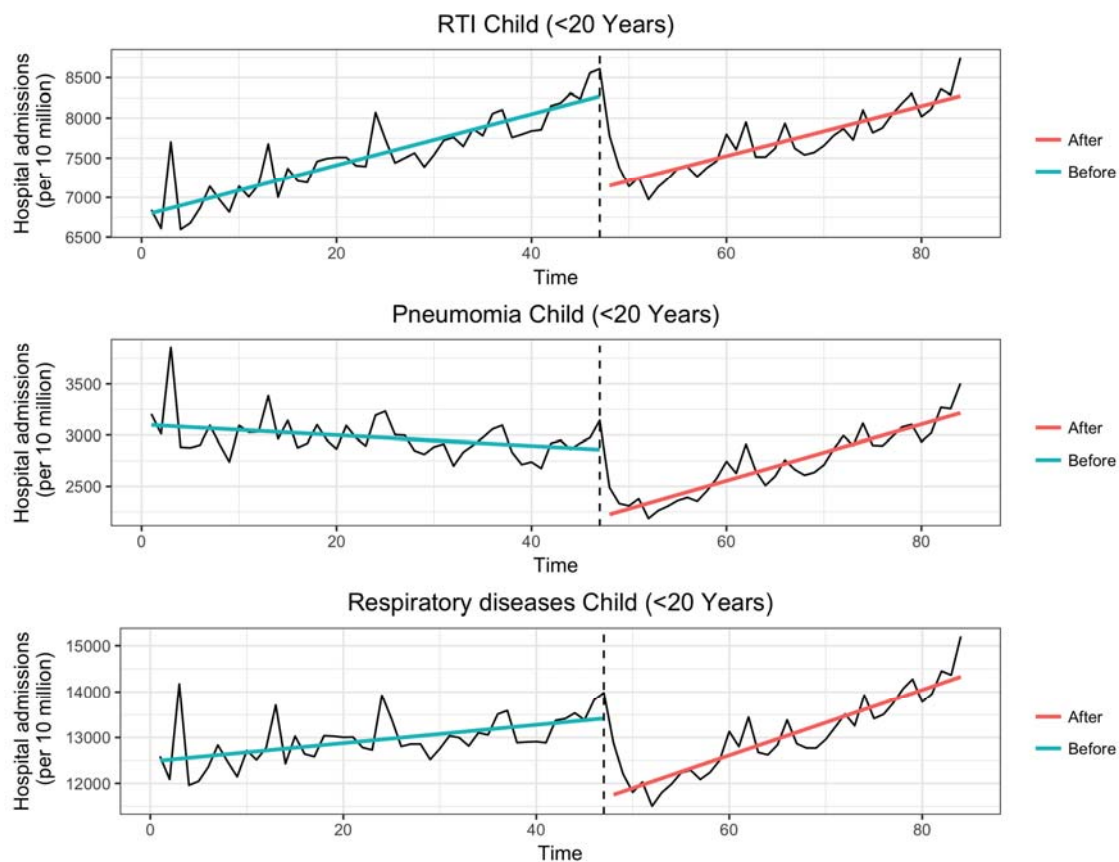

**Fig. 2.** Time series plot of monthly mean, age- and sex-standardised hospital admissions, adjusted for; seasonality, air pollutants and time trend, for RTI, Pneumonia and respiratory disease, in Hong Kong, 2010-2016.

**Table 1.** Hong Kong Air Quality Health Index (AQHI) health risk categories(Environmental Protection Department The Government of Hong Kong SAR 2013)

| Health Risk Category | AQHI | Health advice                                                                                          |                                                                                                                                                         |                                                                                                        |
|----------------------|------|--------------------------------------------------------------------------------------------------------|---------------------------------------------------------------------------------------------------------------------------------------------------------|--------------------------------------------------------------------------------------------------------|
|                      |      | Sensitive Population*                                                                                  | Outdoor Workers                                                                                                                                         | General Public                                                                                         |
| Low                  | 1-3  | Outdoor activities permitted                                                                           | Outdoor activities permitted                                                                                                                            | Ideal for outdoor activities                                                                           |
| Moderate             | 4-6  | Outdoor activities permitted                                                                           | Outdoor activities permitted                                                                                                                            | Outdoor activities permitted                                                                           |
| High                 | 7    | Reduce outdoor activities and time spent outdoors, especially in areas with heavy traffic              | Outdoor activities permitted                                                                                                                            | Outdoor activities permitted                                                                           |
| Very High            | 8-10 | Reduce outdoor activities and time spent outdoors to a minimum, especially in areas with heavy traffic | Employers should evaluate the risk of keeping their workers outdoor and implement preventive measures that would protect the health of their employees. | Reduce outdoor activities and time spent outdoors, especially in areas with heavy traffic              |
| Serious              | 10+  | Avoid all outdoor activities and time spent outdoors, particularly in areas with heavy traffic.        | Employers should evaluate the risk of keeping their workers outdoor and implement preventive measures that would protect the health of their employees. | Reduce outdoor activities and time spent outdoors to a minimum, especially in areas with heavy traffic |

\*Children and the elderly with existing respiratory conditions

**Table 2.** Summary statistics for hospital admissions (counts per day) for respiratory diseases and covariates for the entire study period (2010-2016).

|                                       | Mean   | SD    | Min   | 25th   | Med    | 75th   | Max    |
|---------------------------------------|--------|-------|-------|--------|--------|--------|--------|
| <b>Predicted variables</b>            |        |       |       |        |        |        |        |
| Respiratory diseases                  | 125.92 | 23.83 | 90.37 | 106.92 | 121.22 | 137.21 | 191.50 |
| RTI                                   | 26.18  | 5.42  | 17.75 | 22.55  | 24.94  | 28.60  | 41.65  |
| COPD                                  | 23.70  | 4.83  | 15.53 | 19.51  | 23.01  | 27.14  | 36.65  |
| Asthma                                | 7.85   | 1.37  | 5.01  | 6.93   | 7.71   | 8.48   | 11.26  |
| Pneumonia                             | 48.12  | 8.28  | 35.84 | 42.34  | 47.15  | 51.73  | 70.93  |
| <b>Covariates†</b>                    |        |       |       |        |        |        |        |
| NO <sub>2</sub> (ug/m <sup>3</sup> )  | 49.12  | 10.15 | 28.61 | 41.70  | 48.90  | 55.23  | 71.53  |
| SO <sub>2</sub> (ug/m <sup>3</sup> )  | 11.27  | 2.64  | 6.68  | 9.54   | 10.79  | 12.69  | 19.82  |
| PM <sub>10</sub> (ug/m <sup>3</sup> ) | 41.88  | 16.84 | 16.5  | 27.66  | 39.84  | 53.84  | 84.21  |
| O <sub>3</sub> (ug/m <sup>3</sup> )   | 42.04  | 12.73 | 18.54 | 32.48  | 41.58  | 49.38  | 84.12  |

RTI = Respiratory tract infection, COPD= Chronic obstructive pulmonary disease.

**Table 3.** Approximation of immediate and gradual changes of respiratory diseases after implementation of the AQHI policy in a multivariate analysis<sup>†</sup>.

| Diseases                     | Immediate Effects       | Gradual Effects  |
|------------------------------|-------------------------|------------------|
|                              | RR (95% CI)             | RR (95% CI)      |
| All Respiratory diseases     | 0.92 (0.81-1.04)        | 1.00 (1.00-1.01) |
| Respiratory tract infection  | <b>0.86 (0.76-0.98)</b> | 1.00 (0.99-1.01) |
| COPD                         | 0.97 (0.90-1.05)        | 1.00 (1.00-1.01) |
| Asthma                       | 1.03 (0.91-1.17)        | 1.00 (1.00-1.01) |
| Pneumonia                    | 0.88 (0.77-1.00)        | 1.01 (1.00-1.01) |
| Injuries and External causes | 1.36 (0.92-2.02)        | 0.96 (0.94-0.99) |

<sup>†</sup>Adjusted for seasonality, time trend, SO<sub>2</sub>, NO<sub>2</sub>, PM<sub>10</sub>, O<sub>3</sub>.

<sup>‡</sup>Age standardized based on the World Standard Population.

RTI = Respiratory tract infection, COPD= Chronic obstructive pulmonary disease.

**Table 4.** Approximation of immediate and gradual changes for respiratory diseases by age category<sup>‡</sup> post AQHI policy in a multivariate analysis<sup>†</sup>.

| Diseases        | >20 Years               |                  | 20-65 Years       |                  | < 65 Years        |                  |
|-----------------|-------------------------|------------------|-------------------|------------------|-------------------|------------------|
|                 | Immediate Effects       | Gradual Effects  | Immediate Effects | Gradual Effects  | Immediate Effects | Gradual Effects  |
|                 | RR (95% CI)             | RR (95% CI)      | RR (95% CI)       | RR (95% CI)      | RR (95% CI)       | RR (95% CI)      |
| All Respiratory | 0.86 (0.74-1.00)        | 1.00 (1.00-1.01) | 0.99 (0.88-1.11)  | 1.01 (1.00-1.01) | 1.01 (0.91-1.13)  | 1.00(1.00-1.01)  |
| RTI             | <b>0.84 (0.74-0.96)</b> | 1.00 (0.99-1.01) | 1.01 (0.86-1.19)  | 1.00 (0.99-1.01) | 0.98 (0.80-1.21)  | 1.00 (0.99-1.00) |
| COPD            | 0.46 (0.15-1.37)        | 0.97 (0.92-1.03) | 1.04 (0.95-1.13)  | 1.00 (1.00-1.01) | 0.96 (0.88-1.04)  | 1.00 (1.00-1.01) |
| Asthma          | 1.07 (0.90-1.29)        | 1.00 (0.99-1.01) | 0.94 (0.85-1.03)  | 1.00 (1.00-1.01) | 0.99 (0.88-1.12)  | 1.00 (0.99-1.00) |
| Pneumonia       | <b>0.76 (0.60-0.96)</b> | 1.01 (1.00-1.02) | 0.90 (0.79-1.04)  | 1.01 (1.01-1.02) | 1.00 (0.92-1.09)  | 1.00 (1.00-1.01) |

<sup>†</sup>Adjusted for seasonality, time trend, SO<sub>2</sub>, NO<sub>2</sub>, PM<sub>10</sub>, O<sub>3</sub>.

<sup>‡</sup>Age standardized based on the World Standard Population.

RTI = Respiratory tract infection, COPD= Chronic obstructive pulmonary disease.
